# Supplementary material for: Human hair follicles operate an internal Cori cycle and modulate their growth via glycogen phosphorylase
Source: PubMed Central journal article supplement (PMC8531296; doi:10.1038/s41598-021-99652-8), 2021-10-21
Supplement: 41598_2021_99652_MOESM1_ESM.pdf [file 41598_2021_99652_MOESM1_ESM.pdf]

# Original Western Blot membrane images

**Human hair follicles operate an internal Cori cycle and modulate their growth via glycogen phosphorylase**

**Katarzyna Figlak<sup>1</sup>, Greg Williams<sup>2</sup>, Marta Bertolini<sup>3</sup>, Ralf Paus<sup>3,4,5</sup> and Michael P Philpott<sup>1\*</sup>**

<sup>1</sup>Centre for Cell Biology and Cutaneous Research, Blizard Institute, Barts & The London School of Medicine and Dentistry, Queen Mary College University of London, UK; <sup>2</sup>Farjo Hair Institute, London, UK; <sup>3</sup>Monasterium Laboratory, Münster, Germany; <sup>4</sup>Dr. Phillip Frost Department of Dermatology and Cutaneous Surgery, University of Miami Miller School of Medicine, Miami, FL, USA; <sup>5</sup>Dermatology Research Centre, University of Manchester, and NIHR Biomedical Research Centre, Manchester, UK

# Raw images of western blot membrane from Figure 3f

## Part 1

The membrane was cut at 50kD to include more analysed proteins-the antibodies were optimised before the experiments and did not demonstrate unspecific binding

Precision Plus Protein  
All Blue Protein  
Standard  
Bio-Rad 1610373

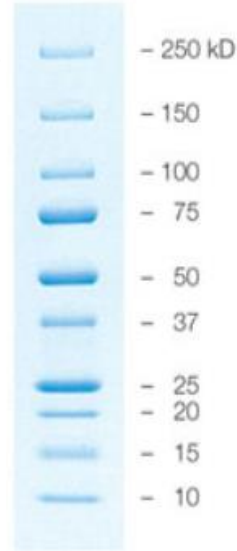

**GAPDH, ab9485**  
Abcam  
37 kD

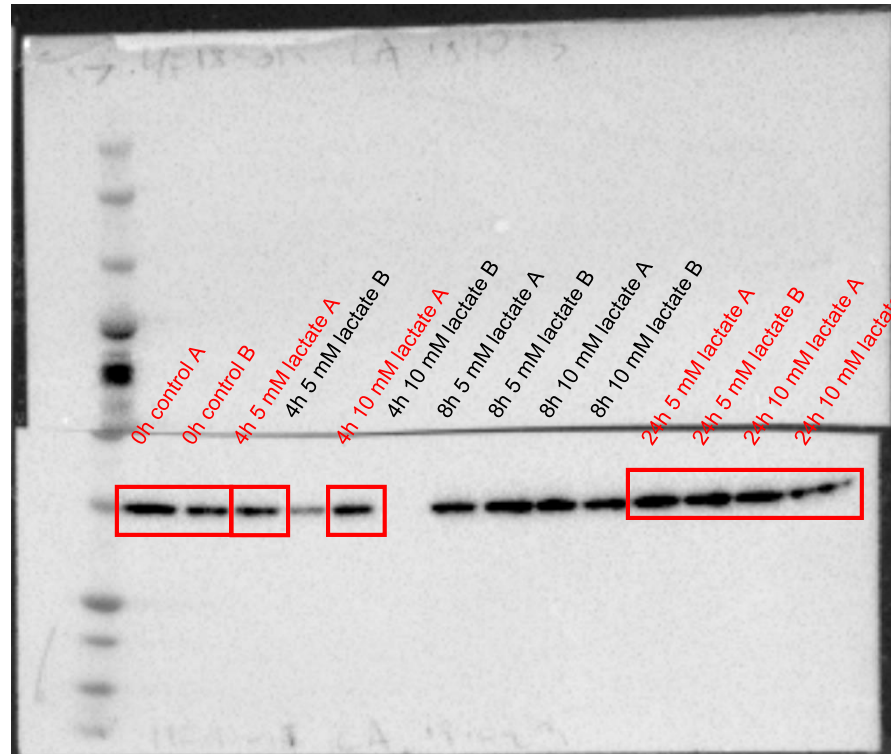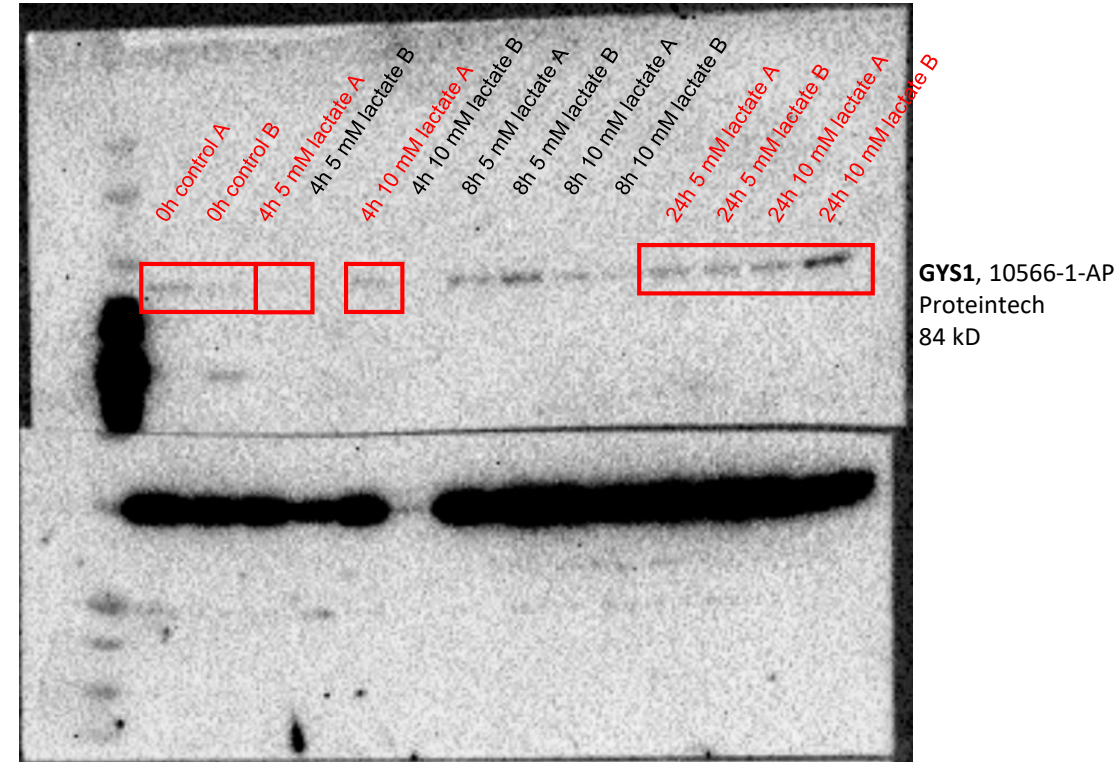

# Raw images of western blot membrane from Figure 3f

## Part 2

The membrane was cut at 50kD to include more analysed proteins-the antibodies were optimised before the experiments and did not demonstrate unspecific binding

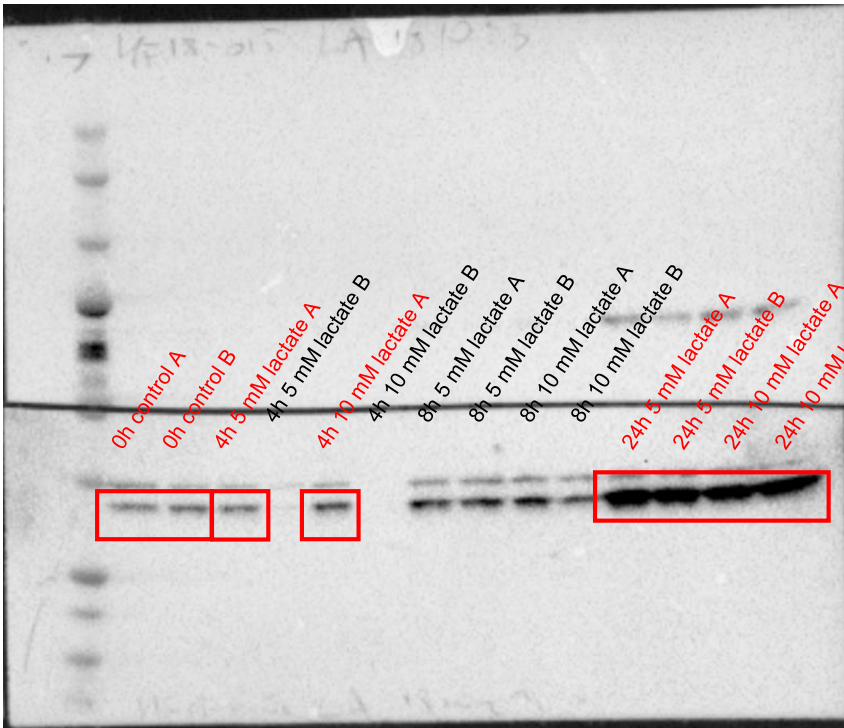

**LDHA, sc-27230**  
 Santa-Cruz  
 35 kD  
 Residual GAPDH after stripping at 37 kD

Precision Plus Protein  
 All Blue Protein  
 Standard  
 Bio-Rad 1610373

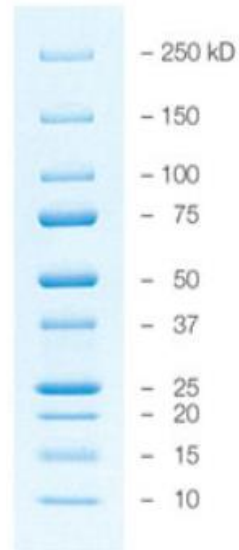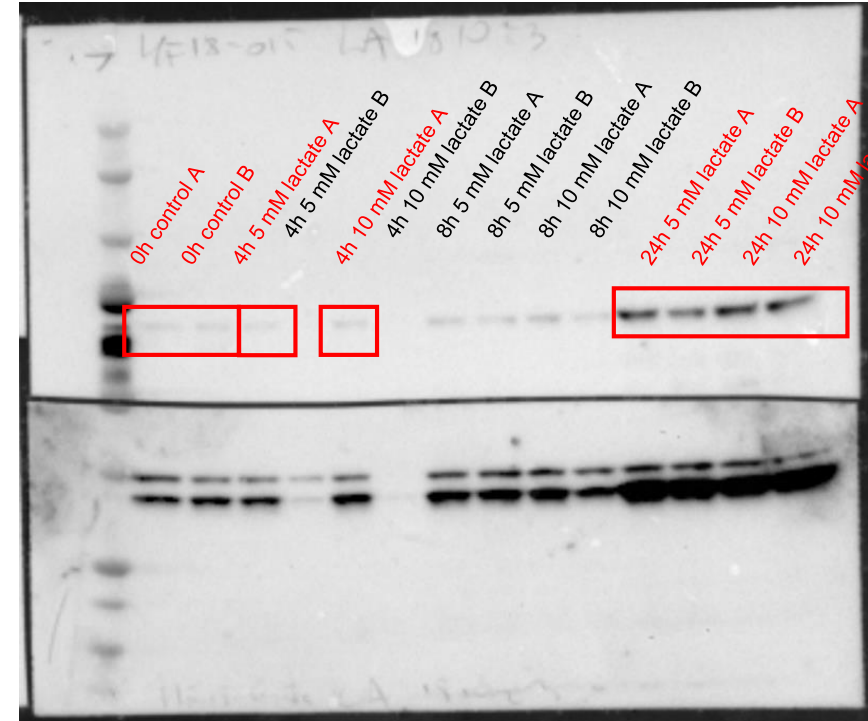

**PCK1, 16754-1-AP**  
 Proteintech  
 67 kD

# Raw images of western blot membrane from Figure 3f

## Part 3

The membrane was cut at 50kD to include more analysed proteins-the antibodies were optimised before the experiments and did not demonstrate unspecific binding

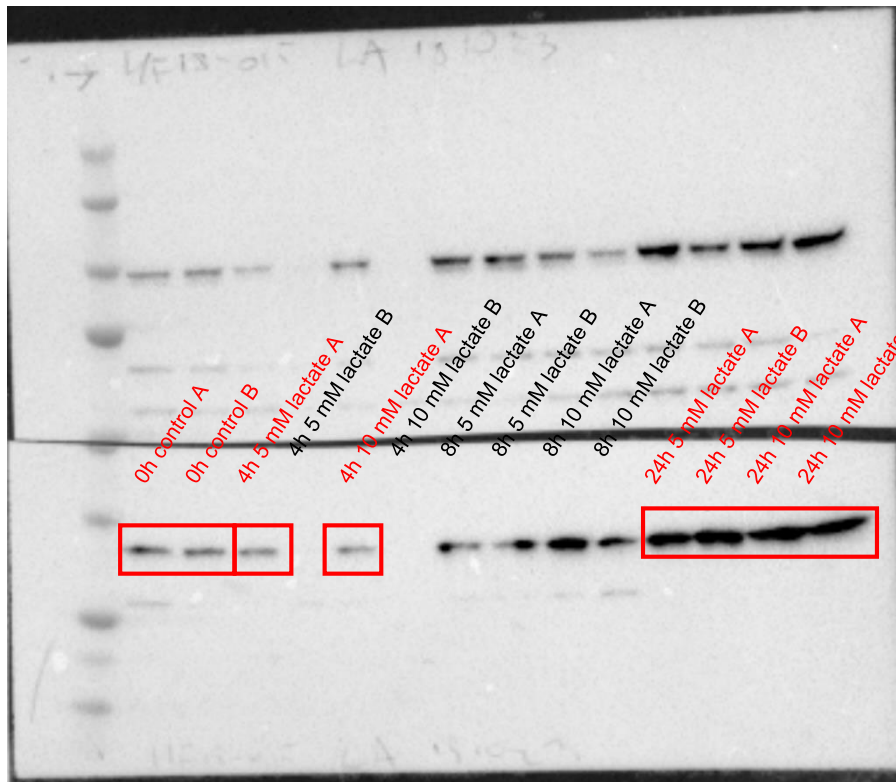

**LDHB**, ab85319  
Abcam  
37 kD

Precision Plus Protein  
All Blue Protein  
Standard  
Bio-Rad 1610373

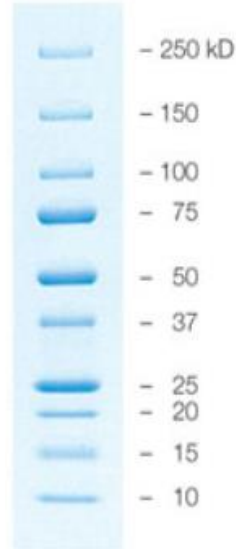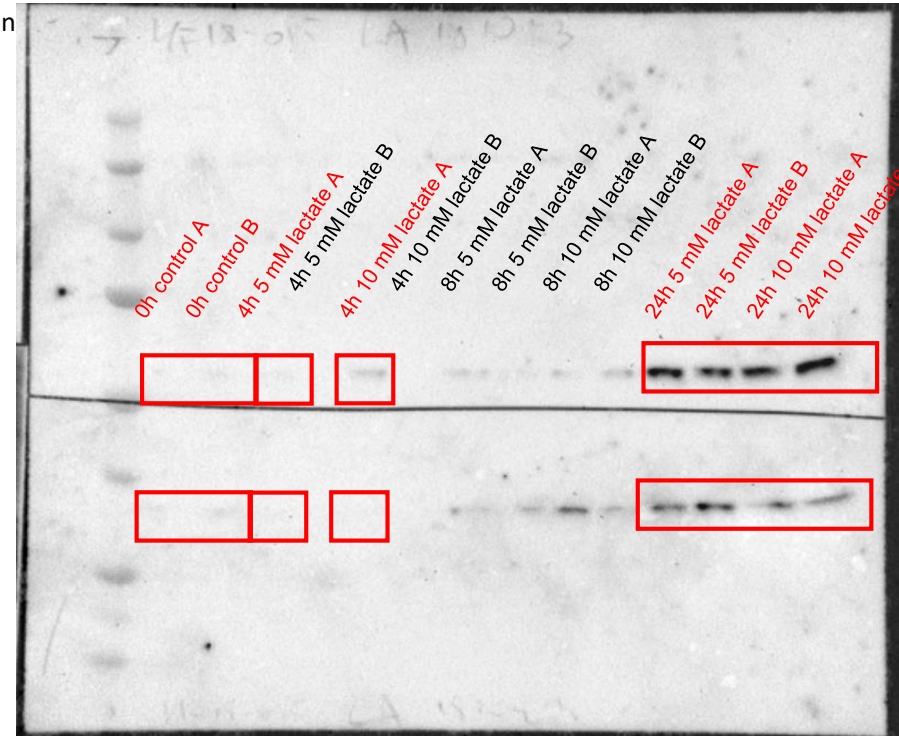

**G6PD**, sc-373886  
Santa Cruz  
58 kD

**G6Pase**, sc-398155  
Santa Cruz  
36 kD



# Raw images of western blot membranes from Figure 4f and Supplementary Figure 3

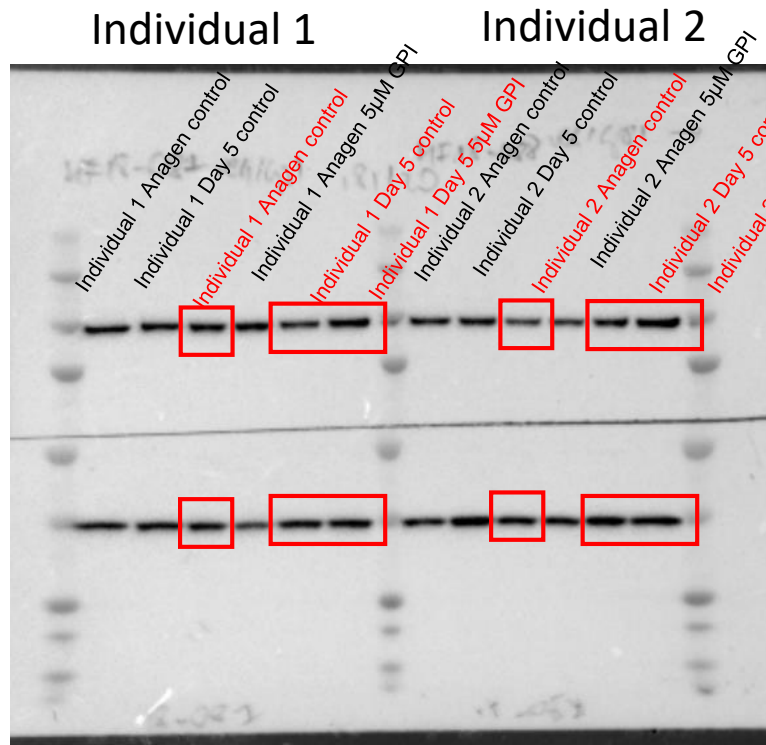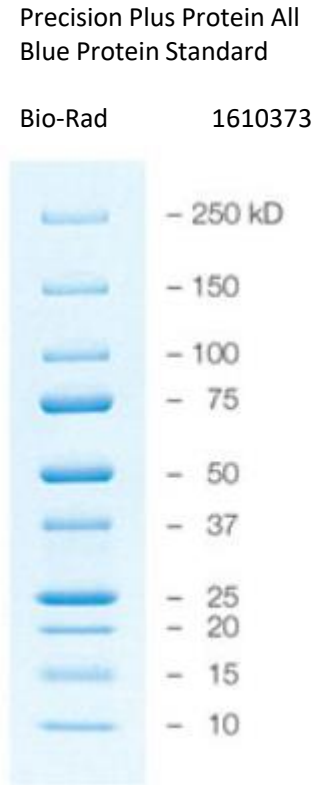

Individual 3

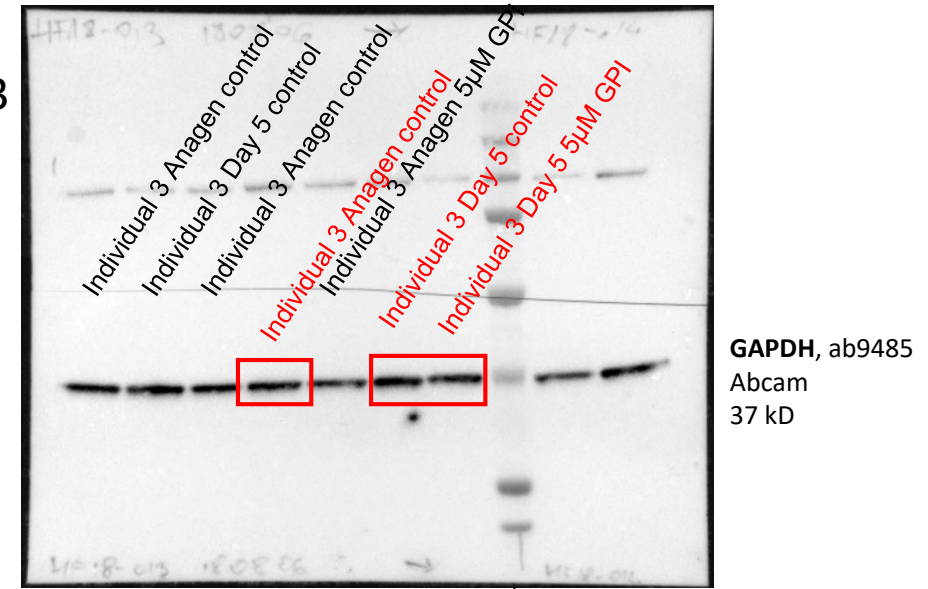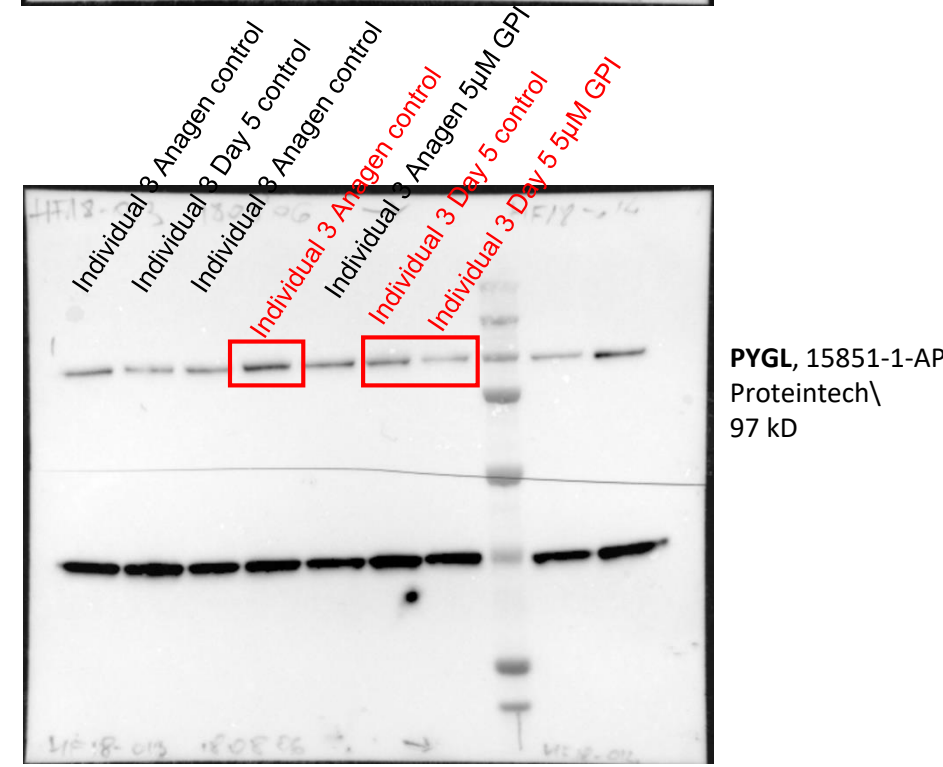

The membrane was cut at 50kD to include more analysed proteins-the antibodies were optimised before the experiments and did not demonstrate unspecific binding



# Raw images of western blot membranes from Supplementary figure 2-part 1

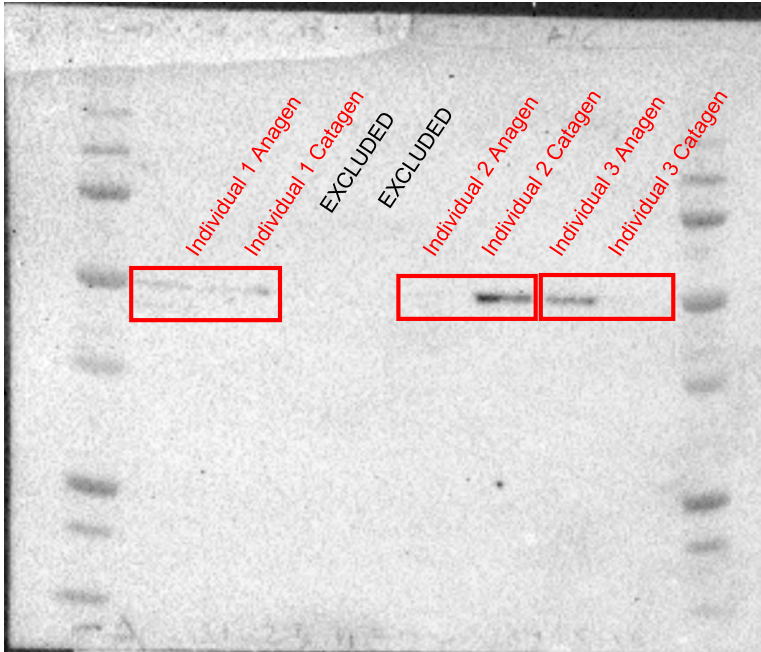

**Glut 1, 21829-1-AP**  
Proteintech  
45-55 kD

Precision Plus Protein All  
Blue Protein Standard

Bio-Rad 1610373

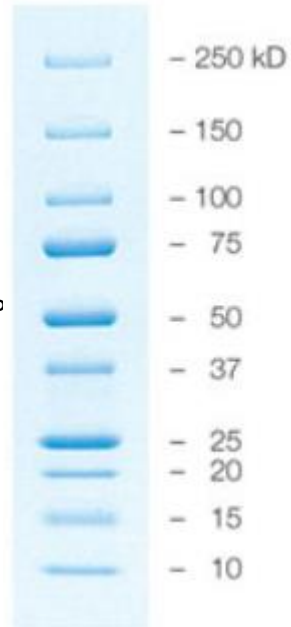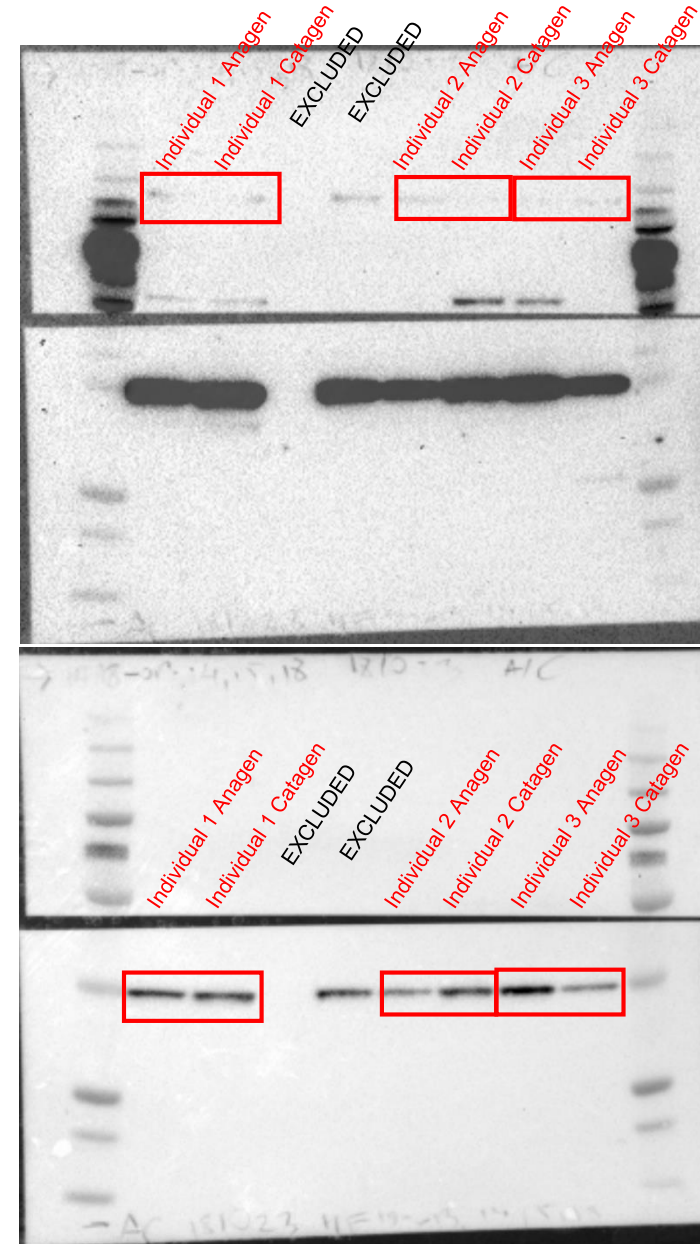

**GYS1, 10566-1-AP**  
Proteintech  
84 kD  
Residual Glut1 after stripping at  
50 kD

**GAPDH, ab9485**  
Abcam  
37 kD

The membrane was cut at 50kD after Glut1 to include more analysed proteins-the antibodies were optimised before the experiments and did not demonstrate unspecific binding



# Raw images of western blot membrane from Supplementary figure 2

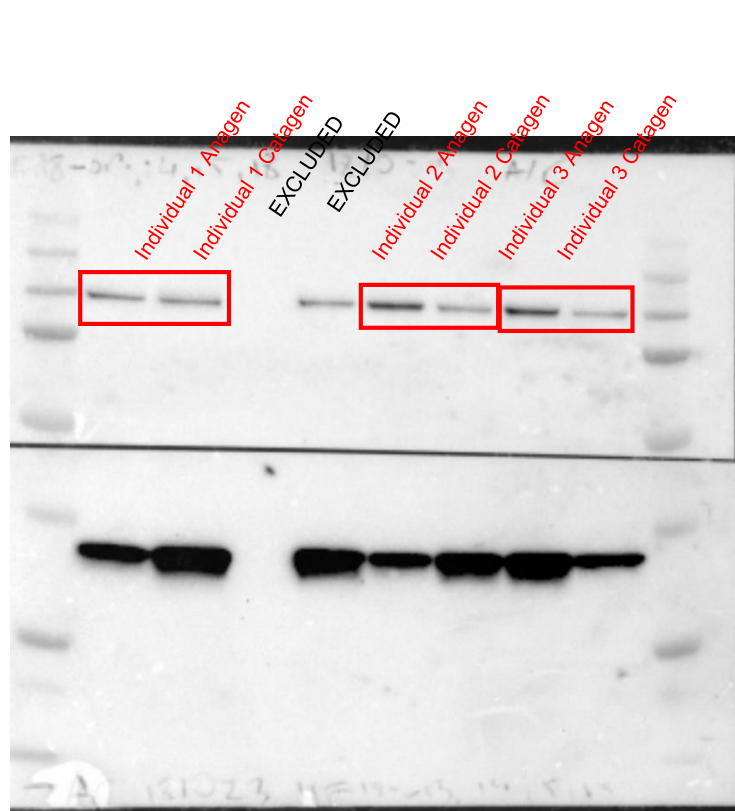

Precision Plus Protein All  
Blue Protein Standard

Bio-Rad 1610373

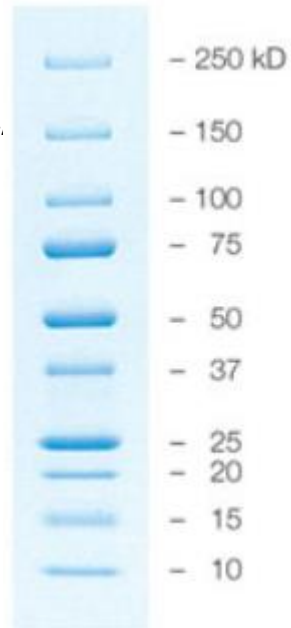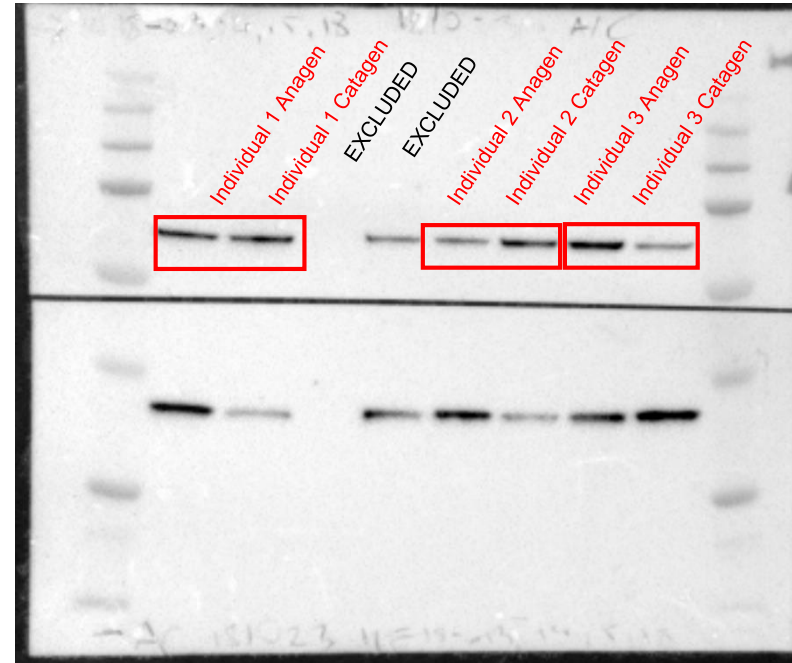

The membrane was cut at 50kD after Glut1 to include more analysed proteins-the antibodies were optimised before the experiments and did not demonstrate unspecific binding
