# Supplementary material for: Human hair follicles operate an internal Cori cycle and modulate their growth via glycogen phosphorylase
Source: PubMed Central journal article supplement (PMC8531296; doi:10.1038/s41598-021-99652-8), 2021-10-21
Supplement: 41598_2021_99652_MOESM2_ESM.pdf [file 41598_2021_99652_MOESM2_ESM.pdf]

# Supplementary figures

**Human hair follicles operate an internal Cori cycle and modulate their growth via glycogen phosphorylase**

**Katarzyna Figlak<sup>1</sup>, Greg Williams<sup>2</sup>, Marta Bertolini<sup>3</sup>, Ralf Paus<sup>3,4,5</sup> and Michael P Philpott<sup>1\*</sup>**

<sup>1</sup>Centre for Cell Biology and Cutaneous Research, Blizard Institute, Barts & The London School of Medicine and Dentistry, Queen Mary College University of London, UK; <sup>2</sup>Farjo Hair Institute, London, UK; <sup>3</sup>Monasterium Laboratory, Münster, Germany; <sup>4</sup>Dr. Phillip Frost Department of Dermatology and Cutaneous Surgery, University of Miami Miller School of Medicine, Miami, FL, USA; <sup>5</sup>Dermatology Research Centre, University of Manchester, and NIHR Biomedical Research Centre, Manchester, UK

## Supplementary Figure 1

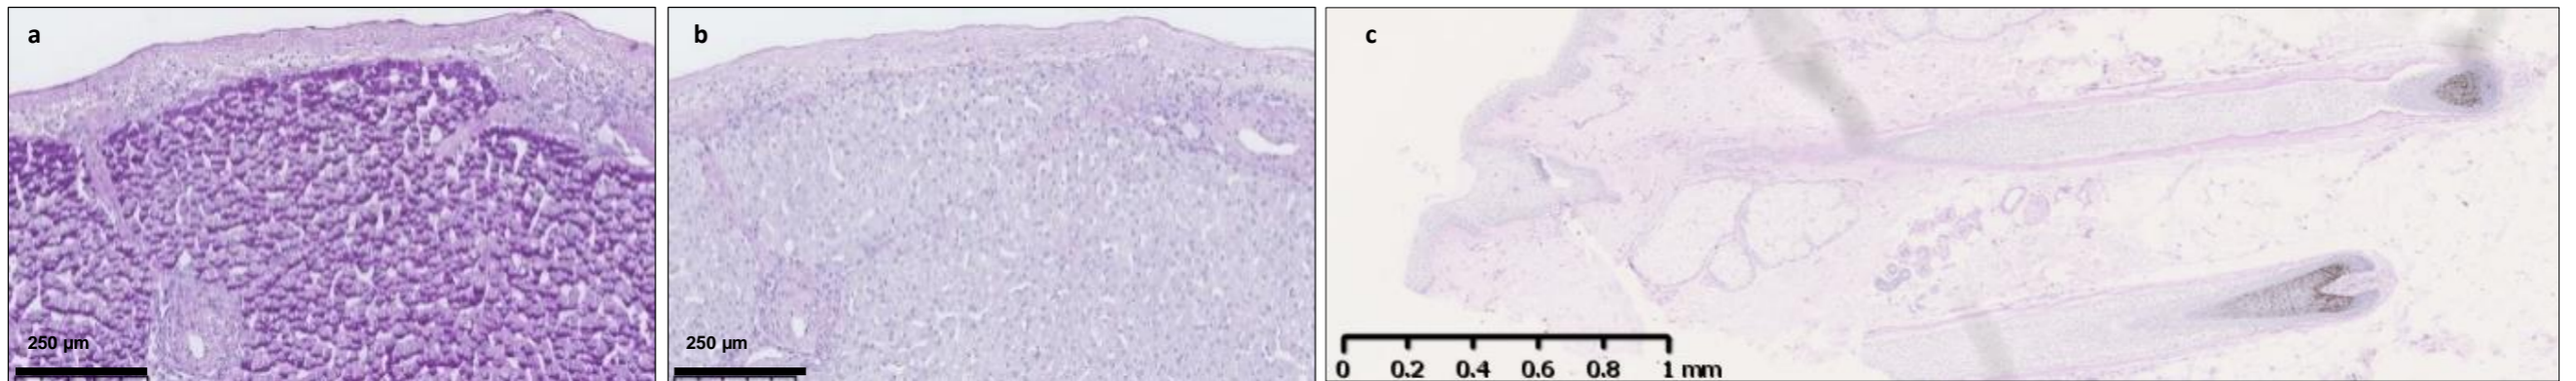

Supplementary Data Figure 1:

Supplement to Figure 1a-h.

Human liver was used as a positive control (a). Specificity of PAS staining for glycogen was shown by digestion of human liver (b) and scalp skin (c) with 0.5% porcine  $\alpha$ -amylase (diastase).

## Supplementary Figure 2

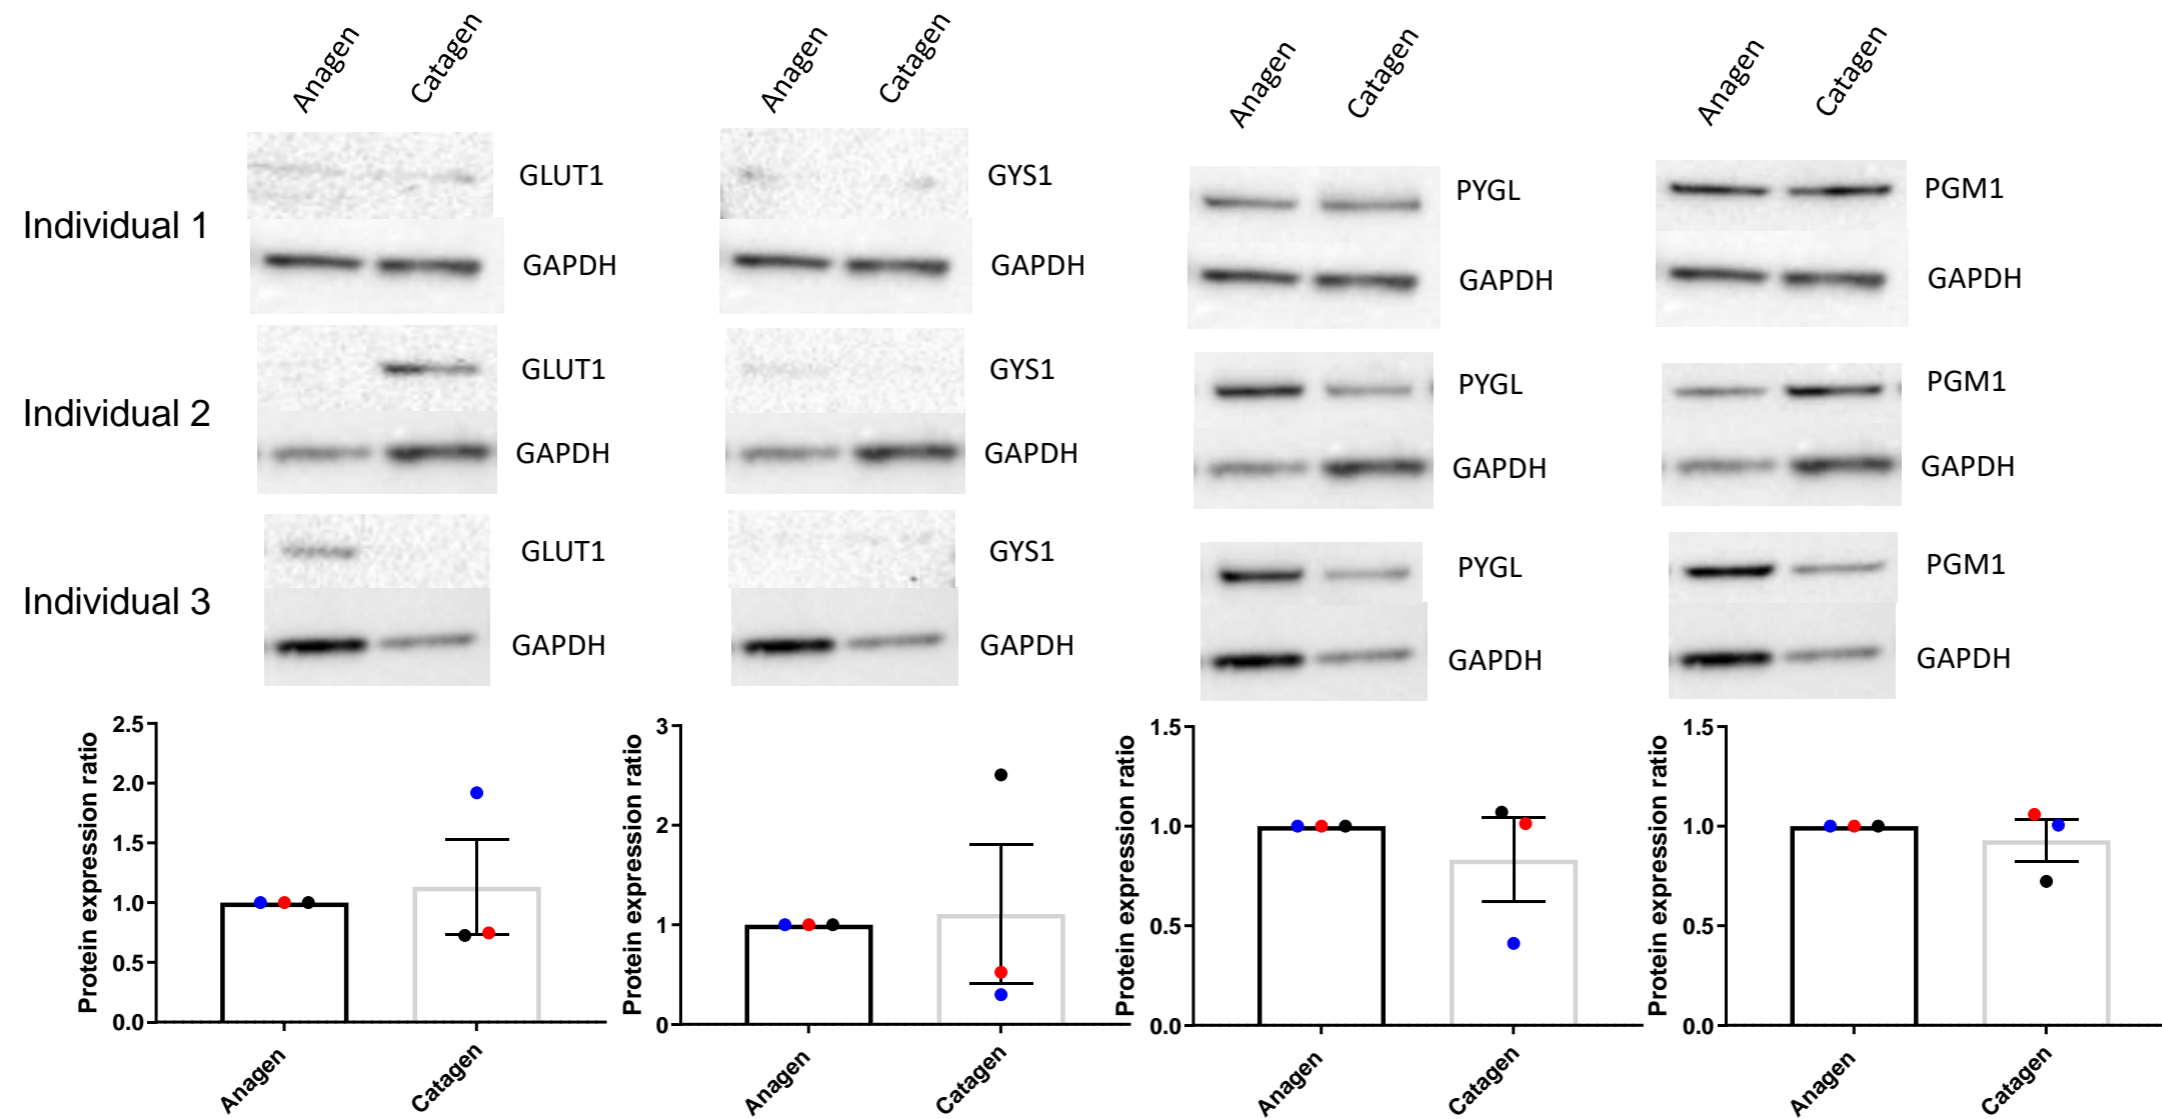

Supplementary Data Figure 2:

Quantified ratios protein expression analysed by western blot and representative images from western blot analysis for GLUT1, GYS1, PYGL and PGM1. GAPDH was used as a loading control. Densitometry measurement carried out in ImageJ software, 3-4 HF's per sample, N=3 (paired two-tailed t-test).

## Supplementary Figure 3

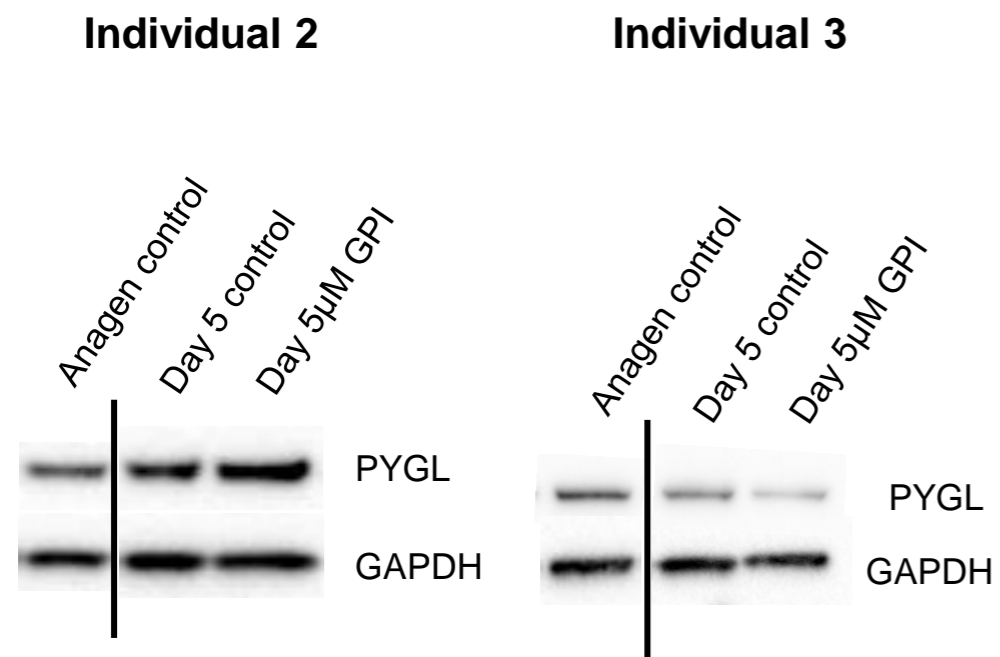

Supplementary Data Figure 3

Supplement to Figure 3f

Western Blot analysis of PYGL expression in HF lysates, 3-4 HF's per sample. GAPDH used as a loading control.
